# Supplementary material for: Nano-Graphene Layer from Facile, Scalable and Eco-Friendly Liquid Phase Exfoliation Strategy as Effective Barrier Layer for High-Performance and Durable Direct Liquid Alcohol Fuel Cells
Source: MDPI journal article supplement (doi:10.3390/molecules27093044), 2022-05-09
Supplement: s1 [file s1]

Supplementary Materials

# Nano-Graphene Layer from Facile, Scalable and Eco-Friendly Liquid Phase Exfoliation Strategy as Effective Barrier Layer for High-Performance and Durable Direct Liquid Alcohol Fuel Cells

Prabhuraj Balakrishnan <sup>1</sup>, Fereshteh Dehghani Sanij <sup>1</sup>, Zhixin Chang <sup>1</sup>, P.K. Leung <sup>2</sup>, Huaneng Su <sup>1</sup>, Lei Xing <sup>3</sup> and Qian Xu <sup>1,\*</sup>

<sup>1</sup> Institute for Energy Research, Jiangsu University, Zhenjiang 212013, China; prabhuraj@ujs.edu.cn (P.B.); dehghan82@gmail.com (F.D.S.); zhixinchang1996@163.com (Z.C.); suhuaneng@ujs.edu.cn (H.S.)

<sup>2</sup> MOE Key Laboratory of Low-grade Energy Utilization Technologies and Systems, Chongqing University, Chongqing 400030, China; leungpuiki@hotmail.com

<sup>3</sup> Department of Chemical Engineering, Loughborough University, Loughborough LE11 3TU, UK; xinglei1314@gmail.com

\* Correspondence: xuqian@ujs.edu.cn

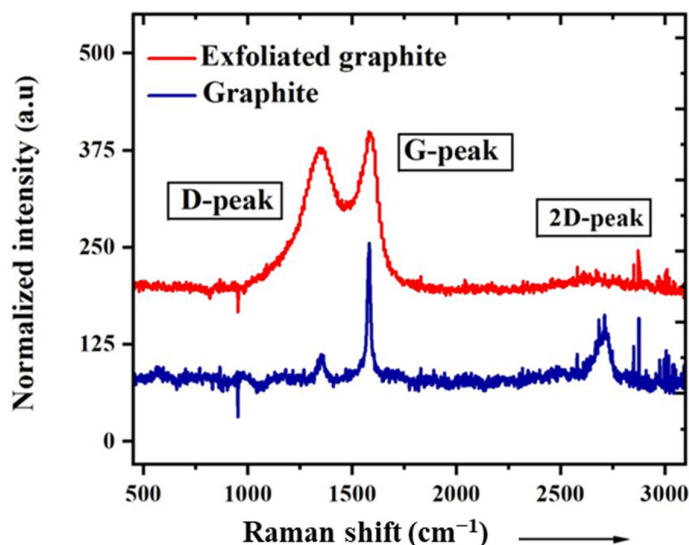

Figure S1. Raman spectrum of graphite and graphene, dropcasted on silicon wafer.

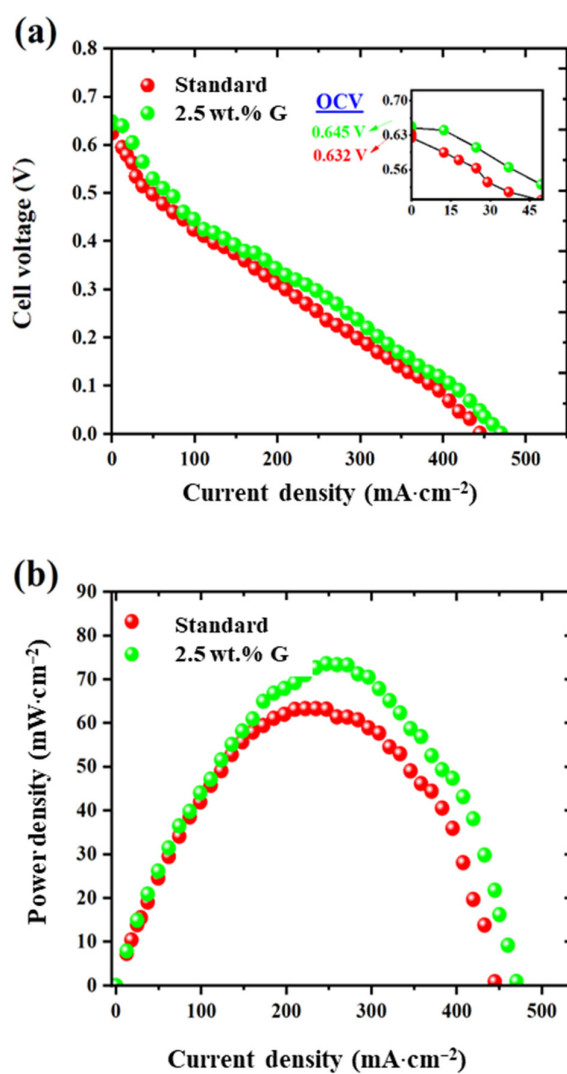

**Figure S2.** (a) Cell voltage; (b) Power density profile obtained at 60 °C in 1 M methanol/oxygen conditions for standard and 2.5 wt.% graphene MEAs.

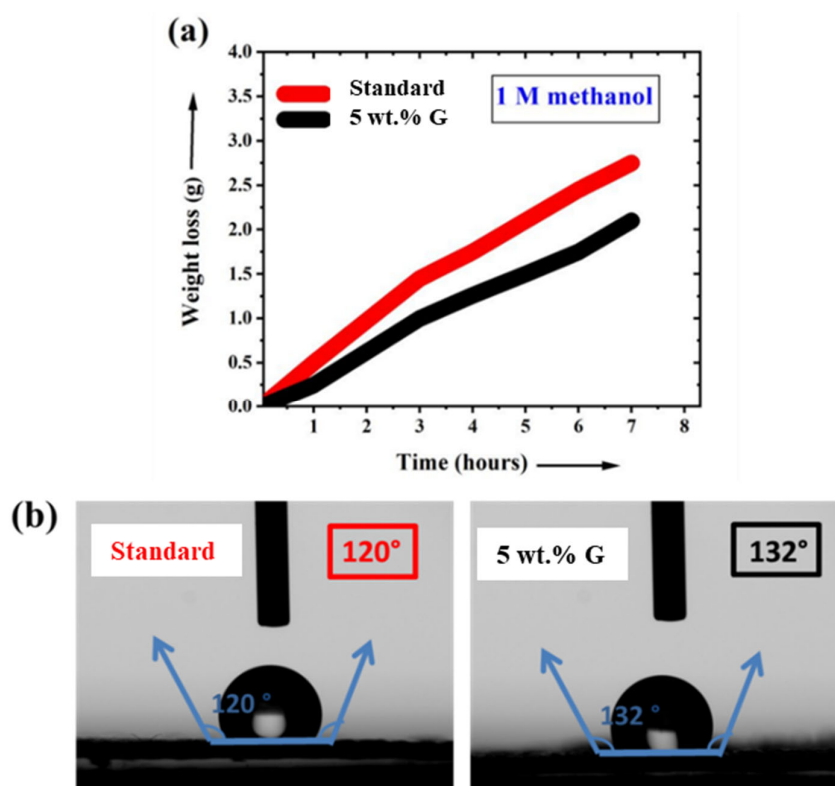

**Figure S3.** (a) Methanol permeability (by gravimetric mode) at 1 M methanol condition and (b) Wettability (contact angle) for standard and graphene 5 wt.% electrodes.

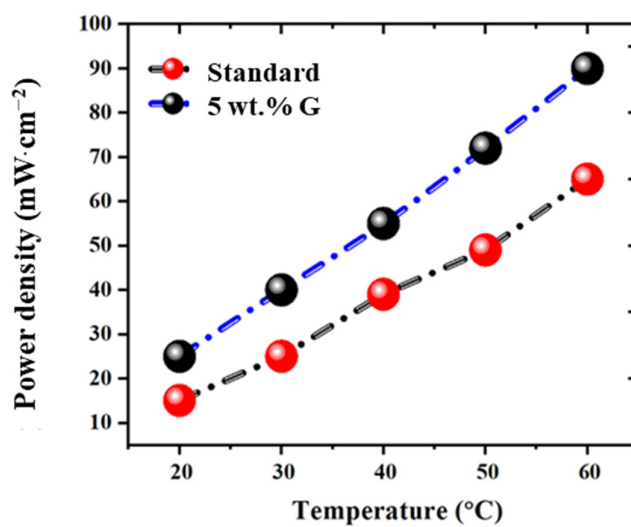

**Figure S4.** Peak power density values for standard and 5 wt.% graphene MEAs at different temperatures.

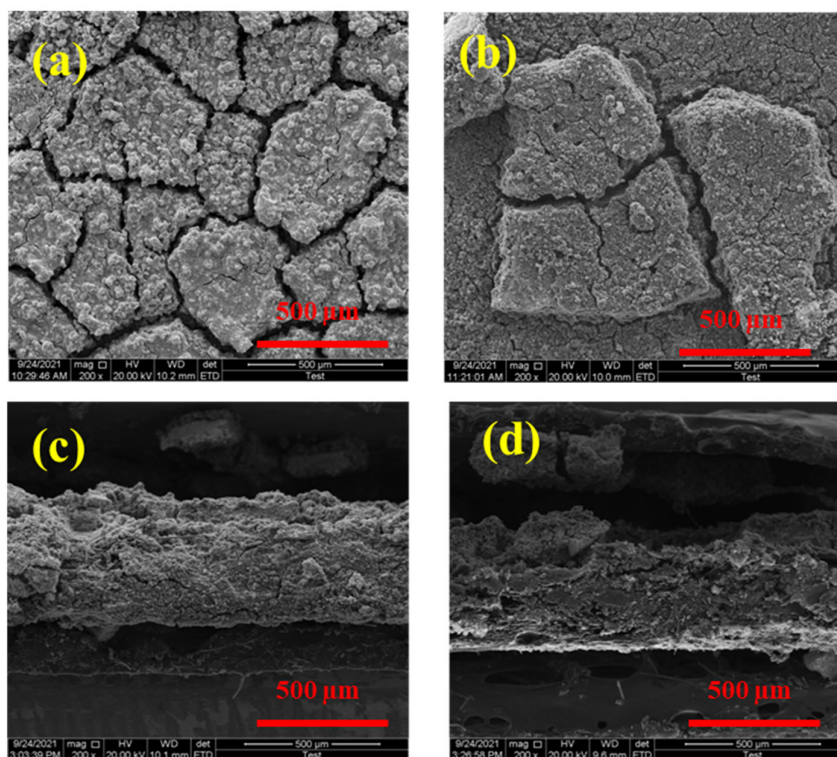

Figure S5. SEM images (a, b - top-view and c, d - cross-sectional) of electrodes coated with 5 wt.% graphene before and after durability testing.

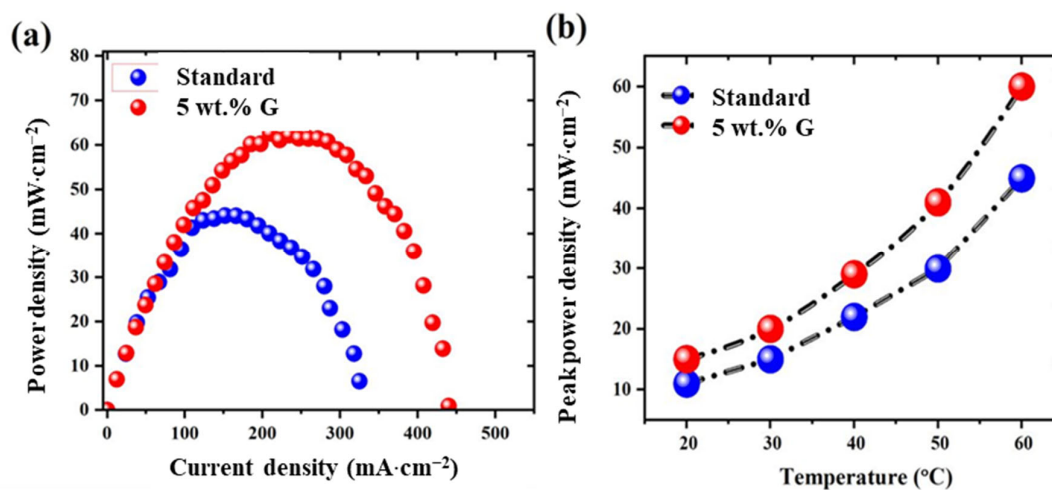

Figure S6. (a) Power density curve and (b) temperature profile of standard and 5 wt.% graphene MEAs at 1 M ethanol concentration.

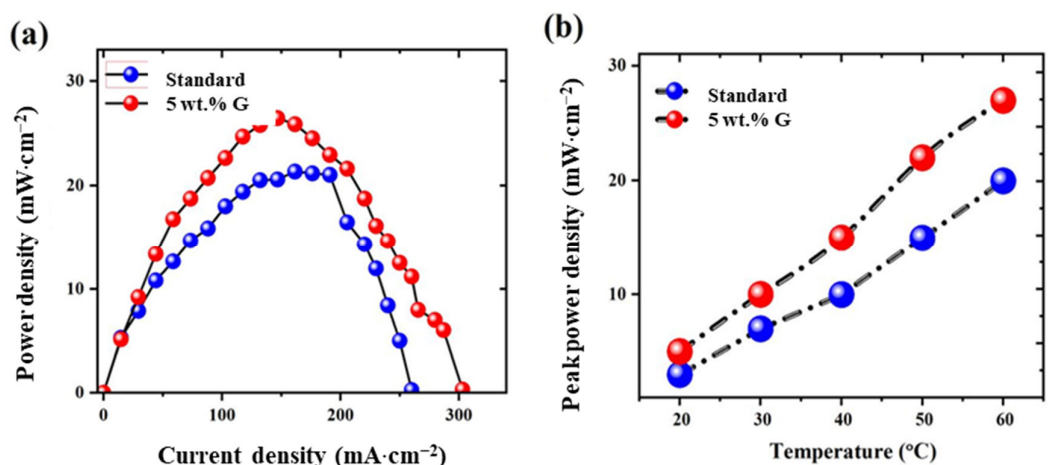

Figure S7. (a) Power density curve and (b) Temperature profile of standard and 5 wt.% graphene MEAs at 1 M 2-propanol concentration.

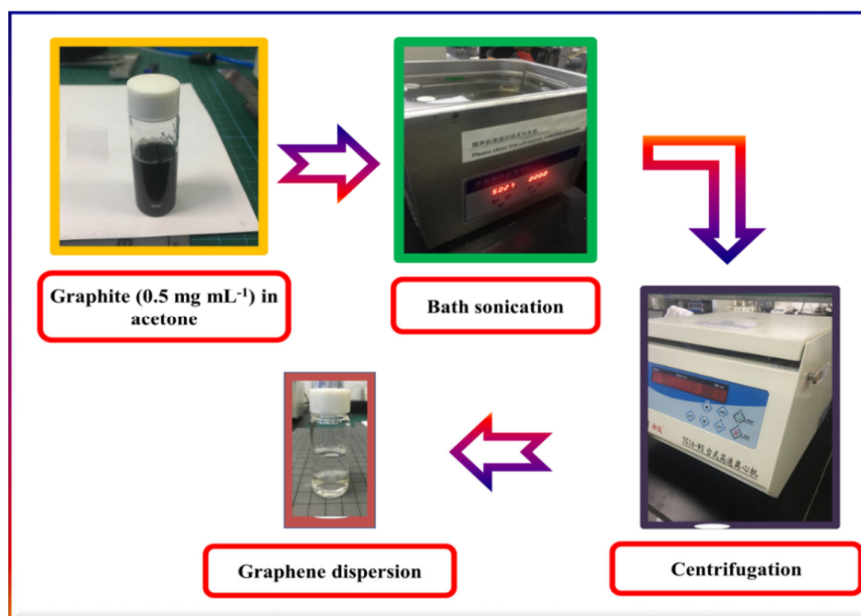

Figure S8. Graphene dispersion preparation procedure.

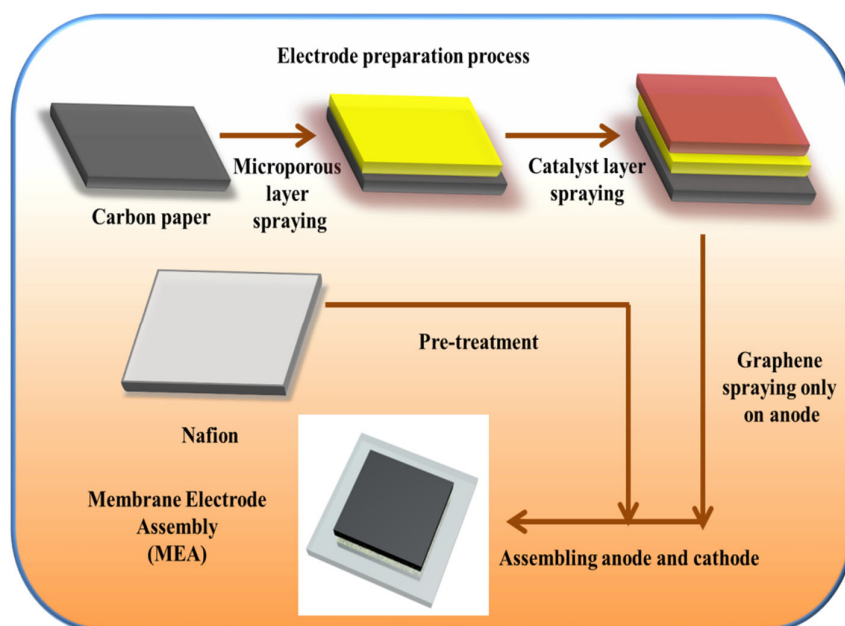

Figure S9. Membrane electrode assembly (MEA) preparation methodology.

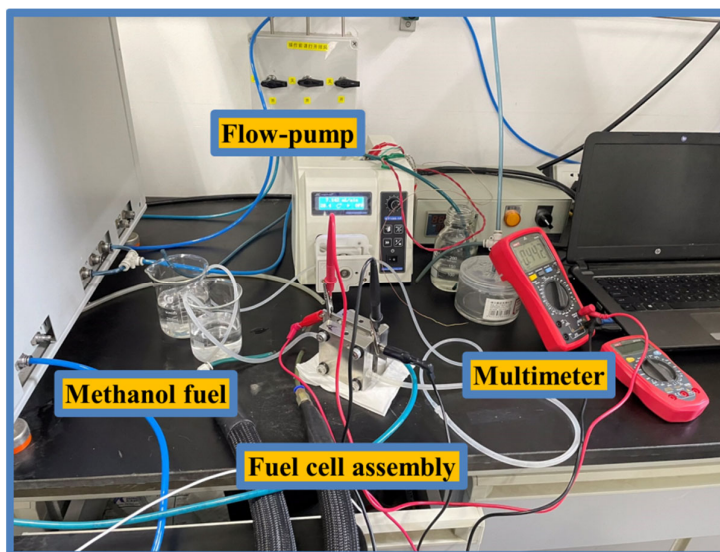

Figure S10. Single fuel cell set up used in the laboratory.



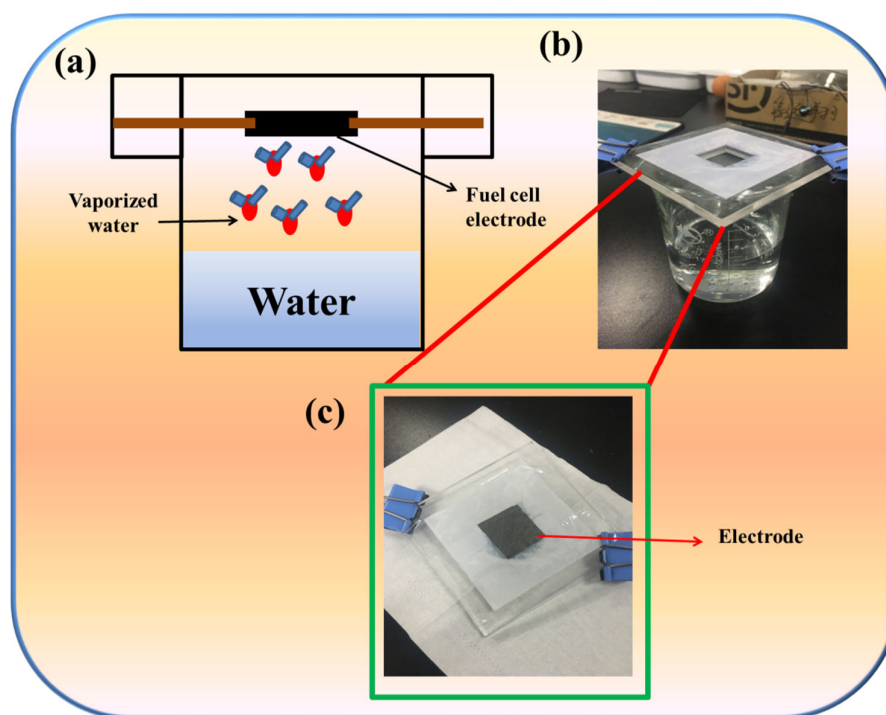

**Figure S11.** (a). Schematic of electrode porosity measurement; (b) Lab-made set up; (c) Closer view of the electrode arrangement.

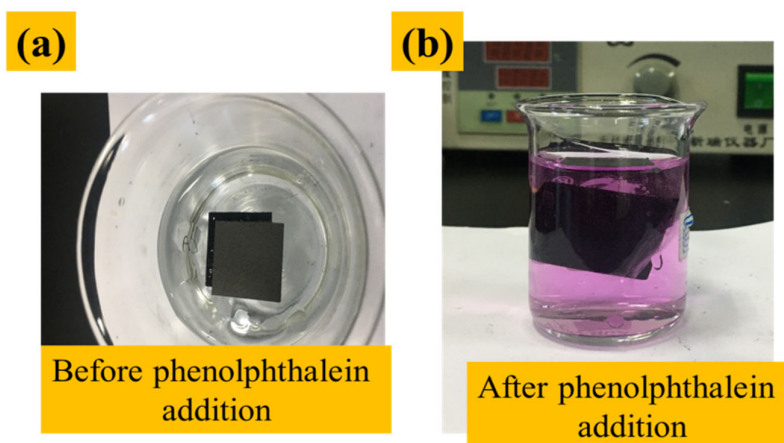

**Figure S12.** Determination of ion-exchange capacity experiment - (a) Before and (b) After phenolphthalein addition.

**Table S1.** Average values of elemental analysis results of graphene flakes by elemental dispersive spectroscopy (EDS).

| GRAPHENE FLAKE | WEIGHT PERCENTAGE (wt.%) |
|----------------|--------------------------|
| Carbon         | 82                       |
| Oxygen         | 18                       |

**Table S2.** Comparison of water-uptake (WU) and ion-exchange capacity values of different electrodes.

| ELECTRODE | WATER UPTAKE | ION-EXCHANGE CAPACITY (%) |
|-----------|--------------|---------------------------|
|           | (WU)<br>(%)  |                           |
| Standard  | --           | --                        |
| 2.5 wt.%  | −6           | 4                         |
| 5 wt.%    | −7           | 5                         |
| 7.5 wt.%  | −10          | 11                        |
| 10 wt.%   | −22          | 18                        |
| 20 wt.%   | −24          | 21                        |
| 25 wt.%   | −32          | 27                        |

**Table S3.** Open circuit voltage, and peak power density values of standard and different graphene wt.% MEAs.

| MEA      | OPEN CIRCUIT VOLTAGE | PEAK POWER DENSITY     |
|----------|----------------------|------------------------|
|          | (V)                  | (mW cm <sup>−2</sup> ) |
| Standard | 0.632                | 63                     |
| 2.5 wt.% | 0.645                | 73                     |
| 5 wt.%   | 0.660                | 91                     |
| 7.5 wt.% | 0.595                | 61                     |
| 10 wt.%  | 0.550                | 45                     |
| 20 wt.%  | 0.500                | 29                     |



Table S4. Comparison of this work with recent literature.

| MATERIAL                                         | PREPARATION METHODOLOGY                                                          | PERFORMANCE RESULTS AND CONDITIONS                                                                                         | REFERENCE               |
|--------------------------------------------------|----------------------------------------------------------------------------------|----------------------------------------------------------------------------------------------------------------------------|-------------------------|
| Graphene-1,4 phenyl diamine hydrochloride (PDHC) | 50 layered arrangement of graphene oxide - PDHC.                                 | Maximum performance of 65 mW cm <sup>-2</sup> compared to showing 35 mW cm <sup>-2</sup> reporting by reducing crossover.  | Wang et al. 2015 [51]   |
| Ozonated graphene (OG)                           | Graphene is exposed to ozone gas                                                 | Nafion-OG-Nafion membrane shows 180 mW·cm <sup>-2</sup> compared to Nafion-G-Nafion performance of 120 mW·cm <sup>-2</sup> | Gao et al. 2014 [52]    |
| Hexagonal nitride (hBN)                          | hBN by mechanical exfoliation                                                    | Spincoated hBN on Nafion showed reduced fuel (hydrogen) permeability reported stable open circuit voltage (OCV)            | Lee et al. 2019 [53]    |
| Graphene                                         | Chemical vapour deposited (CVD) graphene is transferred onto fuel cell electrode | 45% improvement in performance are reported                                                                                | Holmes et al. 2016 [20] |
| Graphene                                         | CVD graphene sandwiched between two Nafion 212                                   | 120% performance improvement at high concentration methanol passive fuel cell systems                                      | Yan et al. 2016 [21]    |
| Graphene                                         | Graphene dispersion from XFNano Inc is sprayed onto anode                        | 82% improvement in performance are reported at 8 M methanol fuel cell conditions                                           | Xu et al. 2020 [22]     |
| Graphene                                         | Graphene prepared by liquid phase exfoliation and added as barrier layer         | 36% improvement in methanol fuel cell performance are reported in addition to ethanol and propanol systems                 | This work               |

## References for Supporting Information

20. Holmes, S.M.; Balakrishnan, P.; Kalangi, V.S.; Zhang, X.; Lozada-Hidalgo, M.; Ajayan, P.M.; Nair, R.R. 2D Crystals Significantly Enhance the Performance of a Working Fuel Cell. *Adv Energy Mater* **2016**, *7*, 1601216.
21. Yan, X.; Wu, R.; Xu, J.; Luo, Z.; Zhao, T. A monolayer graphene–Nafion sandwich membrane for direct methanol fuel cells. *J. Power Sources* **2016**, *311*, 188–194.
22. Xu, Q.; Sun, W.; Zhang, J.; Zhang, W.; Ma, Q.; Su, H.; Xing, L. Constructing a graphene-contained layer in anode to improve the performance of direct methanol fuel cells using high-concentration fuel. *Int. J. Green Energy* **2020**, *18*, 566–577.
51. Wang, L.; Lai, A.; Lin, C.; Zhang, Q.; Zhu, A.; Liu, Q. Orderly sandwich-shaped graphene oxide/Nafion composite membranes for direct methanol fuel cells, *J. Membr. Sci.* **2015**, *492*, 58–66.
52. Gao, W.; Wu, G.; Janicke, M.; Cullen, D.; Mukundan, R.; Baldwin, J.; Brosha, E.; Galande, C.; Ajayan, P.; More, K.; et al. Ozonated Graphene Oxide Film as a Proton-Exchange Membrane, *Angew. Chem., Int. Ed.* **2014**, *53*, 3588–3667.
53. Lee, S.; Jang, W.; Kim, M.; Shin, J.; Park, H.; Jung, N.; Whang, D. Rational Design of Ultrathin Gas Barrier Layer via Reconstruction of Hexagonal Boron Nitride Nanoflakes to Enhance the Chemical Stability of Proton Exchange Membrane Fuel Cells, *Small Methods*. **2019**, *15*, 1903075.
